# Supplementary material for: CO oxidation catalysed by Pd-based bimetallic nanoalloys
Source: Royal Society of Chemistry journal article supplement (doi:10.1039/c5cp00889a), 2015-01-01
Supplement: c5cp00889a1.pdf [file c5cp00889a1.pdf]

# Supplemental Material to CO Oxidation Catalysed by Pd-based Bimetallic Nanoalloys

Dennis Palagin\* and Jonathan P. K. Doye

## I. Structures and relative energies of the $\text{Pd}_{5-x}\text{Au}_x$ and $\text{Pd}_{6-x}\text{Au}_x$ clusters adsorbed on the $\text{TiO}_2$ (110) surface

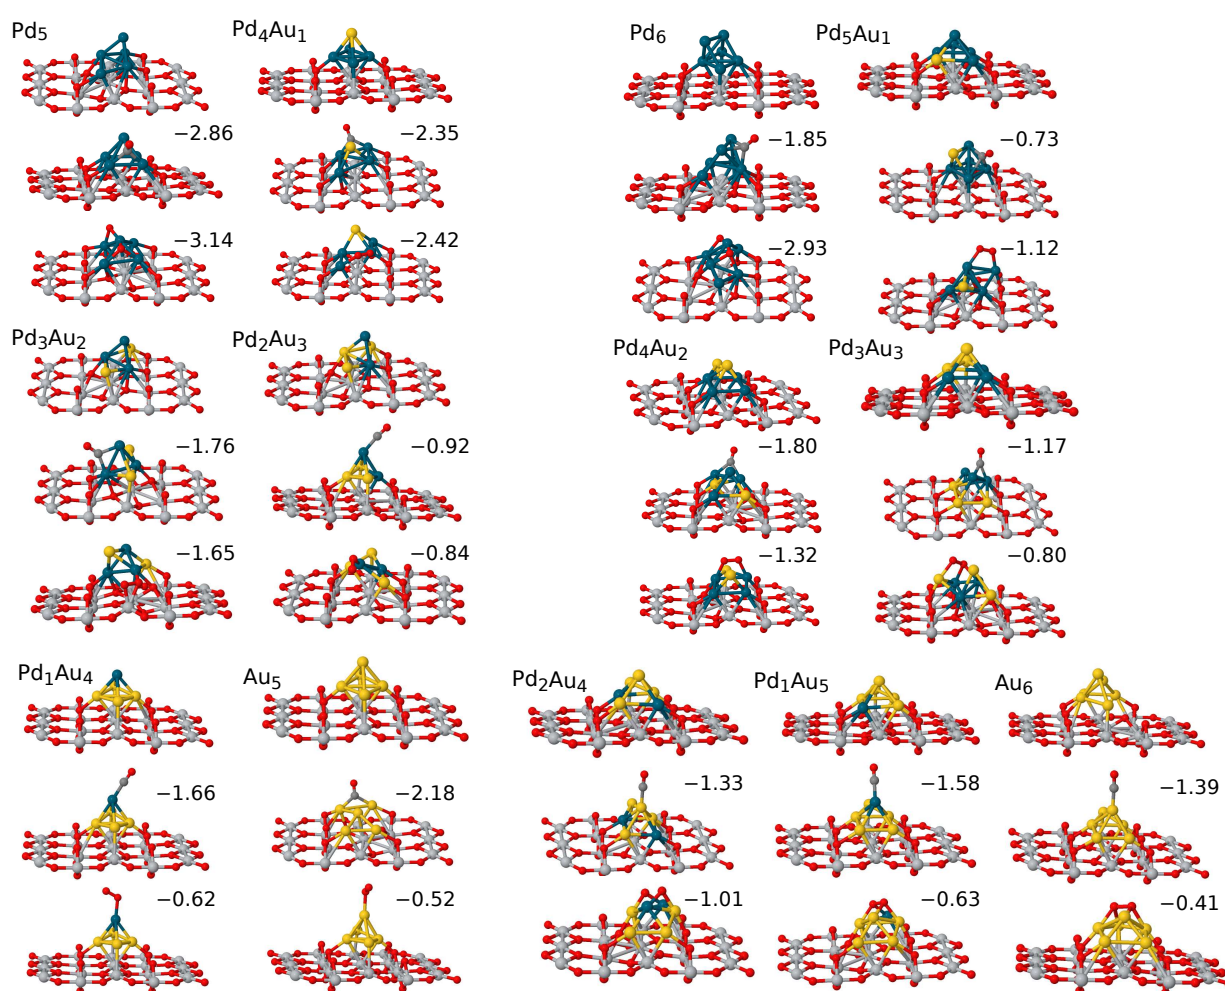

FIG. S1. Lowest-energy  $\text{Pd}_{5-x}\text{Au}_x$  and  $\text{Pd}_{6-x}\text{Au}_x$  clusters adsorbed on the  $\text{TiO}_2$  (110) surface, and their aggregates with CO and  $\text{O}_2$ . Numbers indicate adsorption energies in eV.

\* [dennis.palagin@chem.ox.ac.uk](mailto:dennis.palagin@chem.ox.ac.uk)

All calculations of adsorbed clusters were performed using the CASTEP package as specified in the Computational details section of the manuscript. Periodic slab models were applied for simulations of the  $\text{TiO}_2(110)$  surface. Three stoichiometric bulk layers were used, with the top layer allowed to relax. As an initial configuration, the ground-state configuration of an individual cluster was placed  $2 \text{ \AA}$  above the surface. For elimination of spurious interaction between slabs, the vacuum distance was set to  $18 \text{ \AA}$ . All structures were optimized in the  $\Gamma$ -point approximation.

## II. $\text{Pd}_4\text{Pt}_2$ intermediate aggregates reconfiguration

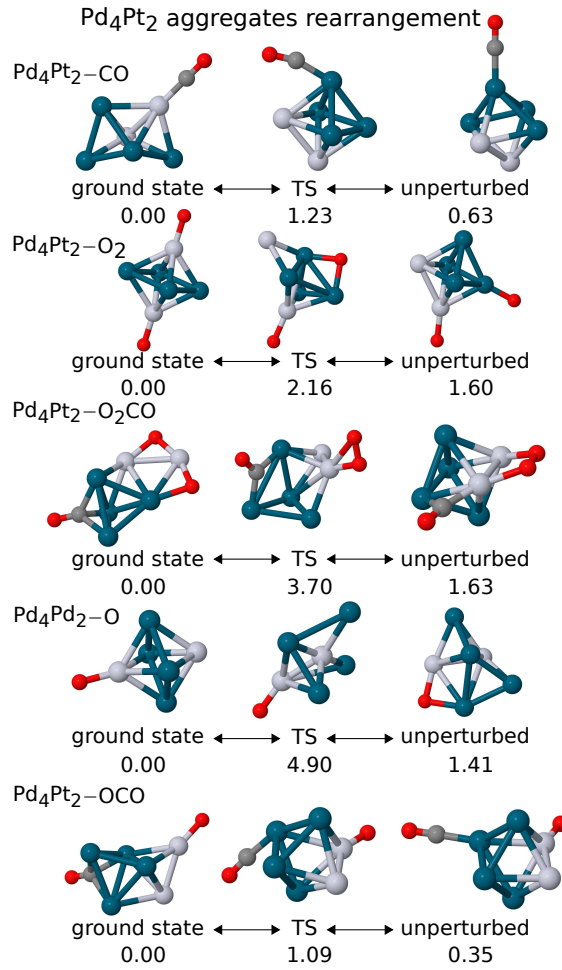

FIG. S2.  $\text{Pd}_4\text{Pt}_2$  intermediate aggregates reconfiguration barriers.
